# Supplementary material for: Trends in Screen Time Use Among Children During the COVID-19 Pandemic, July 2019 Through August 2021
Source: PubMed Central journal article supplement (PMC9932850; doi:10.1001/jamanetworkopen.2022.56157), 2023-02-15
Supplement: jamanetwopen-e2256157-s001.pdf [file jamanetwopen-e2256157-s001.pdf]

## Supplemental Online Content

Hedderson MM, Bekelman TA, Li M, et al; Environmental Influences on Child Health Outcomes Program. Trends in screen time use among children during the COVID-19 pandemic, July 2019 through August 2021. *JAMA Netw Open*. 2023;6(2):e2256157.  
doi:10.1001/jamanetworkopen.2022.56157

**eTable 1.** Description of Cohorts Included in Analytic Sample

**eTable 2.** Comparison of Participants Who Completed the Survey Versus Those Consented but Who Did Not Complete the Survey (n=317)

**eTable 3.** Characteristics of Study Sample, Stratified by Cohort

**eTable 4.** Prepandemic Screen Time by Cohort

**eTable 5.** Estimated Associations Between Total Screen Time and Pandemic Periods, Stratified by Cohort

**eTable 6.** Estimated Change in Total Screen Time, Educational Screen Time, and Recreational Screen Time Between the First Pandemic and the Prepandemic Time Period

**eTable 7.** Estimated Change in Total Screen Time, Educational Screen Time, and Recreational Screen Time Between the Second Pandemic and the Prepandemic Time Period

This supplemental material has been provided by the authors to give readers additional information about their work.

**eTable 1. Description of Cohorts Included in Analytic Sample**

| <b>Award</b>                                                                                            | <b>Cohort Name</b><br>Citation                                  | <b>Recruitment Life Stage</b> | <b>Type of Cohort</b>                     | <b>Target Population</b>                                                                                                            | <b>Primary ECHO Outcome Area(s)</b>                           |
|---------------------------------------------------------------------------------------------------------|-----------------------------------------------------------------|-------------------------------|-------------------------------------------|-------------------------------------------------------------------------------------------------------------------------------------|---------------------------------------------------------------|
| The Early Life Exposome and Childhood Health – The Colorado Healthy Start 3 Cohort Study                | Healthy Start <sup>1</sup>                                      | Prenatal                      | Clinic/hospital-based;<br>Community-based | General population<br><br>Healthy pregnant women without prior adverse birth outcomes                                               | Obesity                                                       |
| Environmental Influences on Child Health Outcomes in the Northern Plains Safe Passage Study Cohort      | Safe Passage Study <sup>2</sup> (PASS)                          | Prenatal                      | Clinic/hospital-based                     | Rural and American Indian pregnant women with singletons or twins living in communities with historically high prenatal alcohol use | Pre-, Peri-, Postnatal<br><br>Airways<br><br>Neurodevelopment |
| Early Life Exposure to Endocrine Disrupting Chemicals and Child Growth; Adiposity; and Neurodevelopment | Pregnancy Environment and Lifestyle Study <sup>3</sup> (PETALS) | Prenatal                      | Clinic/hospital-based                     | General population<br><br>Healthy pregnant women with singletons                                                                    | Pre-, Peri-, Postnatal                                        |
|                                                                                                         | Kaiser Permanente Research Bank <sup>4</sup> (KPRB)             | Prenatal                      | Clinic/hospital-based                     | General population<br><br>Healthy pregnant women                                                                                    | Pre-, Peri-, Postnatal                                        |

**eTable 2. Comparison of Participants Who Completed the Survey Versus Those Consented but Who Did Not Complete the Survey (n=317)**

|                                  | <b>Completed survey during pandemic (n=228)</b> | <b>Did not complete survey during pandemic (n=89)</b> |
|----------------------------------|-------------------------------------------------|-------------------------------------------------------|
| Race & Ethnicity, n(%)           |                                                 |                                                       |
| Non-Hispanic White               | 108 (47.4%)                                     | 29 (31.5%)                                            |
| Non-Hispanic Black               | 18 (7.9%)                                       | 7 (7.9%)                                              |
| Non-Hispanic other               | 37 (16.2%)                                      | 25 (28.1%)                                            |
| Hispanic, all races              | 65 (28.5%)                                      | 28 (31.5%)                                            |
| Maternal Education, n (%)        |                                                 |                                                       |
| Some college, no degree or lower | 71 (31.1%)                                      | 47 (52.8%)                                            |
| Bachelor's degree or higher      | 157 (68.8%)                                     | 39 (42.7%)                                            |
| Missing                          | 0                                               | 3 (3.4%)                                              |

**eTable 3. Characteristics of Study Sample, Stratified by Cohort**

| <b>Cohort</b>                                   | <b>All Cohorts</b> | <b>Colorado</b> | <b>South Dakota</b> | <b>California</b> |
|-------------------------------------------------|--------------------|-----------------|---------------------|-------------------|
| <b>N</b>                                        | <b>228</b>         | <b>74</b>       | <b>39</b>           | <b>115</b>        |
| <b>Female sex, n (%)</b>                        | 100 (43.9%)        | 36 (48.6%)      | 19 (48.7%)          | 45 (39.1%)        |
| <b>Baseline child age in years, mean (SD)</b>   | 7.0 (2.7)          | 8.7(0.5)        | 11.2 (0.2)          | 4.47 (0.2)        |
| <b>Baseline Age group, yrs old, n (%)</b>       |                    |                 |                     |                   |
| 4 to <5                                         | 115 (50.4%)        | 0 (0%)          | 0 (0%)              | 115 (100%)        |
| 5 to <9                                         | 50 (21.9%)         | 50 (67.6%)      | 0 (0%)              | 0 (0%)            |
| ≥9                                              | 63 (27.6%)         | 24 (32.4%)      | 39 (100%)           | 0 (0%)            |
| <b>Race &amp; Ethnicity, n (%) <sup>1</sup></b> |                    |                 |                     |                   |
| Non-Hispanic White                              | 108 (47.4%)        | 40 (54.1%)      | 31 (79.5%)          | 37 (32.2%)        |
| Non-Hispanic Black                              | 18 (7.9%)          | 13 (17.6%)      | 0 (0%)              | 5 (4.3%)          |
| Non-Hispanic other                              | 37 (16.2%)         | 7 (9.5%)        | <8 (<18%)           | 23 (20.0%)        |
| Hispanic all races                              | 65 (28.5%)         | 14 (18.9%)      | <5 (<3%)            | 50 (43.5%)        |
| <b>Maternal Education, n (%) <sup>2</sup></b>   |                    |                 |                     |                   |
| Some college, no degree or lower                | 71 (31.1%)         | 18 (24.3%)      | 9 (23.1%)           | 44 (38.3%)        |
| Bachelor's degree                               | 80 (35.1%)         | 20 (27.0%)      | 21 (53.8%)          | 39 (33.9%)        |
| Master's degree or higher                       | 77 (33.8%)         | 36 (48.6%)      | 9 (23.1%)           | 32 (27.8%)        |
| <b>Annual household income, n (%)</b>           |                    |                 |                     |                   |
| <\$30,000                                       | 11 (4.8%)          | 6 (8.1%)        | <5                  | <5                |
| \$30,000- \$49,999                              | 24 (10.5%)         | 11 (14.9%)      | 5 (12.8%)           | 10 (8.7%)         |
| \$50,000- \$74,999                              | 32 (14.0%)         | 11 (14.9%)      | <5                  | 18 (15.7%)        |
| \$75,000-\$99,999                               | 32 (14.0%)         | 8 (10.8%)       | 6 (15.4%)           | 18 (15.7%)        |
| ≥\$100,000                                      | 124 (54.4%)        | <40 (<55%)      | 22 (56.4%)          | 66 (57.4%)        |
| Missing                                         | 5 (2.2%)           | <5              | <5                  | <5                |
| <b>Number of siblings in household, n (%)</b>   |                    |                 |                     |                   |
| 0                                               | 15 (6.6%)          | <10             | <5                  | 9 (7.8%)          |
| 1                                               | 101 (44.3%)        | 30 (40.5%)      | 13 (33.3%)          | 58 (50.4%)        |
| 2                                               | 65 (28.5%)         | 22 (29.7%)      | 14 (35.9%)          | 29 (25.2%)        |
| 3                                               | 29 (12.7%)         | 9 (12.2%)       | 8 (20.5%)           | 12 (10.4%)        |
| ≥4                                              | 13 (5.7%)          | <5              | <5                  | 7 (6.1%)          |
| Missing                                         | 5 (2.2%)           | <5              | <5                  | 0 (0%)            |
|                                                 |                    |                 |                     |                   |

| <b>How COVID 19 affected maternal job (% yes)</b>               |            |            |            |            |
|-----------------------------------------------------------------|------------|------------|------------|------------|
| Moved to working remotely or from home                          | 89 (39.0%) | 28 (37.8%) | 11 (28.2%) | 50 (43.5%) |
| Missing                                                         | <5         | <5         | 0 (0%)     | <5         |
|                                                                 |            |            |            |            |
| Did not have a paying job before                                | 23 (10.1%) | 9 (12.2%)  | <5         | 12 (10.4%) |
| Missing                                                         | <5         | <5         | 0 (0%)     | <5         |
|                                                                 |            |            |            |            |
| Lost the job permanently/<br>temporarily/<br>Reduced work hours | 56 (24.6%) | 18 (24.3%) | 6 (15.4%)  | 32 (27.8%) |
| Missing                                                         | <5         | <5         | 0 (0%)     | <5         |
|                                                                 |            |            |            |            |
| Got a new job/<br>Increased work hours                          | 29 (12.7%) | 8 (10.8%)  | <5         | 18 (15.7%) |
| Missing                                                         | <5         | <5         | 0 (0%)     | <5         |

<sup>1</sup> Non-Hispanic other includes 13 Asian, 7 American Indian or Alaska Native, and 17 Multiple race children.

<sup>2</sup> Some college, no degree or lower including associate degree, trade school, high school degree, GED or equivalent, and less than high school. Master's degree or higher also include (professional) doctoral degree.

<sup>3</sup> Children were included in this sample if they had at least one of the same screen time outcomes for both pre-pandemic (July 1, 2019- March 15, 2020) and one post-pandemic periods (December 1, 2020 – April 30, 2021 or May 1, 2021 – August 31, 2021).

**eTable 4. Prepandemic Screen Time by Cohort**

| <b>Outcomes</b>                                         | <b>Colorado</b> | <b>South Dakota</b> | <b>California</b> |
|---------------------------------------------------------|-----------------|---------------------|-------------------|
| <b>N</b>                                                | <b>(N= 74)</b>  | <b>(N= 39)</b>      | <b>(N=115)</b>    |
| <b>Screen time, hrs/day, mean (SD)<br/>median [IQR]</b> |                 |                     |                   |
| <b>Total duration</b>                                   | 5.2 (4.8)       | 4.9 (3.2)           | 3.6 (3.3)         |
|                                                         | 3.4 [1.6, 7.6]  | 4.3 [2.7, 5.6]      | 2.8 [1.5, 4.4]    |
| <b>Weekday duration</b>                                 | 4.7 (5.0)       | 4.3 (3.4)           | 3.5 (3.8)         |
|                                                         | 2.6 [1.0, 6.7]  | 3.5 [2.1, 4.5]      | 2.5 [1.5, 4.0]    |
| <b>Weekend duration</b>                                 | 6.2 (4.6)       | 6.4 (3.4)           | 3.9 (2.8)         |
|                                                         | 4.0 [3.0, 8.9]  | 6.0 [4.0, 8.0]      | 3.3 [2.0, 5.0]    |
| <b>Educational duration<sup>b</sup></b>                 | 0.69 (1.7)      | 0.62 (0.91)         | 0.25 (0.60)       |
|                                                         | 0 [0, 0.56]     | 0.25 [0, 0.83]      | 0 [0, 0.26]       |
| <b>Recreational duration<sup>c</sup></b>                | 4.7 (4.3)       | 4.3 (2.6)           | 3.4 (3.2)         |
|                                                         | 3.0 [1.6, 6.4]  | 3.6 [2.4, 5.2]      | 2.6 [1.5, 4.0]    |
| Watching TV <sup>d</sup>                                | 2.1 (1.9)       | 1.9 (1.3)           | 2.2 (2.1)         |
|                                                         | 1.6 [0.86, 2.8] | 1.6 [1.1, 2.5]      | 1.6 [1.0, 2.7]    |
| Playing Games <sup>e</sup>                              | 1.9 (2.8)       | 1.6 (1.3)           | 0.86 (1.7)        |
|                                                         | 1.0 [0.30, 1.9] | 1.3 [0.63, 2.3]     | 0.36 [0, 0.97]    |
| Video Chatting                                          | 0.12 (0.45)     | 0.087 (0.25)        | 0.079 (0.17)      |
|                                                         | 0 [0, 0]        | 0 [0, 0]            | 0 [0, 0.080]      |
| Browsing Website                                        | 0.13 (0.35)     | 0.25 (0.47)         | 0.019 (0.20)      |
|                                                         | 0 [0, 0]        | 0 [0, 0.40]         | 0 [0, 0]          |
| Others <sup>f</sup>                                     | 0.74 (1.6)      | 0.44 (0.74)         | 0.22 (0.74)       |
|                                                         | 0.18 [0, 0.90]  | 0.12 [0, 0.55]      | 0 [0, 0.13]       |
| <b>Social media account</b>                             |                 |                     |                   |
| Yes                                                     | <5              | <10                 | 0 (0%)            |
| No                                                      | 70 (94.6%)      | 29 (74.4%)          | 115 (100%)        |
| missing                                                 | <5              | <5                  | 0 (0%)            |
| <b>Watch TV with caregivers</b>                         |                 |                     |                   |
| Some of the time/Most of the time                       | 8 (10.8%)       | 5 (12.8%)           | 20 (17.4%)        |
| Never/Hardly ever                                       | 66 (89.2%)      | 34 (87.2%)          | 95 (82.6%)        |
| missing                                                 | 0 (0%)          | 0 (0%)              | 0 (0%)            |
| <b>Play video game with caregivers</b>                  |                 |                     |                   |
| Some of the time/Most of the time                       | 46 (62.2%)      | 25 (64.1%)          | 94 (81.7%)        |
| Never/Hardly ever                                       | <30             | <15                 | <25               |
| missing                                                 | <5              | <5                  | <5                |

|                                                                         |            |            |             |
|-------------------------------------------------------------------------|------------|------------|-------------|
| <b>Play computer game with caregivers</b>                               |            |            |             |
| Some of the time/Most of the time                                       | 52 (70.3%) | 30 (76.9%) | 101 (87.8%) |
| Never/Hardly ever                                                       | <20        | <10        | <15         |
| missing                                                                 | <5         | <5         | <5          |
| <b>Play games on an education game device with caregivers</b>           |            |            |             |
| Some of the time/Most of the time                                       | 59 (79.7%) | 34 (87.2%) | 82 (71.3%)  |
| Never/Hardly ever                                                       | 9 (12.2%)  | <5         | 32 (27.8%)  |
| missing                                                                 | 6 (8.1%)   | <5         | <5          |
| <b>Play games or use apps on a smartphone or tablet with caregivers</b> |            |            |             |
| Some of the time/Most of the time                                       | 39 (52.7%) | 24 (61.5%) | 55 (47.8%)  |
| Never/Hardly ever                                                       | <35        | 15 (38.5%) | <60         |
| missing                                                                 | <5         | 0 (0%)     | <5          |
| <b>Video-chat with caregivers</b>                                       |            |            |             |
| Some of the time/Most of the time                                       | 52 (70.3%) | 32 (82.1%) | 77 (67.0%)  |
| Never/Hardly ever                                                       | <20        | <10        | <40         |
| missing                                                                 | <5         | <5         | <5          |

<sup>a</sup>July 1, 2019- March 15, 2020

<sup>b</sup>Includes “Playing games on an education game device (such as Leapster / LeapPad, LeapFrog Epic, Playtime Pad, or V-Tech device - V-Smile, Mobigo, or Innotab)” and “Doing homework on a computer or tablet”. This is a weighted average of weekday and weekend duration.

<sup>c</sup>Includes “Watching TV shows, DVDs, or videos”, “Playing video games”, “Playing computer games”, “Playing games or using apps on a smartphone or tablet”, “Video Chatting”, “Browsing websites”, “Doing anything else on a computer”, and “Doing anything else on a smartphone or tablet”. This is a weighted average of weekday and weekend duration.

<sup>d</sup>Watching TV shows, DVDs, or videos (include time spent watching on a TV set, computer, smartphone, and tablet; this includes watching shows that may have been previously recorded). This is a weighted average of weekday and weekend duration.

<sup>e</sup>Includes “Playing video games”, “Playing computer games”, and “Playing games or using apps on a smartphone or tablet”. This is a weighted average of weekday and weekend duration.

<sup>f</sup>Includes “Doing anything else on a computer (such as looking at pictures, looking up things, social networking, emailing, shopping, text messaging)” and “Doing anything else on a smartphone or tablet (such as taking or looking at pictures, looking up things, social networking, emailing, text messaging, or using other types of apps not already covered)”. This is a weighted average of weekday and weekend duration.

**eTable 5. Estimated Associations Between Total Screen Time and Pandemic Periods, Stratified by Cohort**

|                                  | Colorado             | South Dakota        | California           |
|----------------------------------|----------------------|---------------------|----------------------|
| <b>N of Observations</b>         | 187                  | 109                 | 322                  |
| <b>Time point</b>                |                      |                     |                      |
| Pandemic 1                       | 3.41 (1.25, 5.56)    | 3.84 (-2.38, 10.06) | 1.43 (-1.08, 3.95)   |
| Pandemic 2                       | 2.86 (0.14, 5.59)    | 4.60 (-3.16, 12.37) | 0.62 (-2.45, 3.70)   |
| <b>Age, yrs old</b>              | -0.46 (-1.98, 1.06)  | -1.12 (-6.14, 3.90) | 0.52 (-1.53, 2.57)   |
| <b>Male</b>                      | -0.30 (-1.74, 1.13)  | -0.99 (-2.92, 0.94) | 0.02 (-1.02, 1.05)   |
| <b>Number of siblings</b>        | 0.27 (-0.36, 0.90)   | -0.68 (-1.89, 0.53) | 0.11 (-0.38, 0.60)   |
| <b>Race &amp; Ethnicity</b>      |                      |                     |                      |
| Hispanic all races, n (%)        | 4.56 (2.65, 6.48)    | 0.28 (-6.95, 7.52)  | 1.78 (0.58, 2.99)    |
| Non-Hispanic Black, n (%)        | 7.04 (5.10, 8.97)    | Not estimable       | 1.71 (-0.91, 4.33)   |
| Non-Hispanic other , n (%)       | 3.63 (0.97, 6.29)    | 0.77 (-2.00, 3.53)  | 1.34 (-0.08, 2.75)   |
| Non-Hispanic White, n (%)        | REF                  | REF                 | REF                  |
| <b>Maternal Education, n (%)</b> |                      |                     |                      |
| Some college, no degree or lower | REF                  | REF                 | REF                  |
| Bachelor's degree                | -3.15 (-5.16, 1.14)  | 0.18 (-2.44, 2.80)  | -1.31 (-2.54, -0.09) |
| Master's degree or higher        | -2.37 (-4.16, -0.57) | -1.42 (-4.32, 1.47) | -1.93 (-3.33, -0.54) |

<sup>1</sup> Beta coefficients from linear mixed effects models that include cohort and child as random intercepts to adjust for the within cohort and within child correlations. Each screentime outcome represents the weighted average of weekday and weekend parent-reported screentime. Maximum Likelihood method was used to fit model. P-values were given from LMEM t-test. The analysis was conducted using the R package “lme4”.

<sup>3</sup> The reference group is the pre-pandemic period: July 1, 2019- March 15, 2020. Pandemic data collection period 1 is December 1, 2020 – April 30, 2021, and pandemic period 2 is May 1, 2021 – August 31, 2021.



**eTable 6. Estimated Change in Total Screen Time, Educational Screen Time, and Recreational Screen Time Between the First Pandemic and the Prepandemic Time Period**

|                                             | <b>Total screen time (hours/day)<sup>a</sup></b> | <b>Educational screen time (hours/day)<sup>a</sup></b> | <b>Recreational screen time (hours/day)<sup>a</sup></b> |
|---------------------------------------------|--------------------------------------------------|--------------------------------------------------------|---------------------------------------------------------|
| <b>N of Observations</b>                    | 211                                              | 211                                                    | 211                                                     |
| <b>Pre-pandemic screen time<sup>b</sup></b> | -0.51 (-0.65, -0.37)                             | -0.82 (-1.04, -0.59)                                   | -0.44 (-0.58, -0.31)                                    |
| <b>Baseline age</b>                         | 0.32 (0.12, 0.52)                                | 0.09 (-0.02, 0.20)                                     | 0.29 (0.12, 0.46)                                       |
| <b>Male</b>                                 | -0.67 (-1.63, 0.28)                              | -0.24 (-0.74, 0.25)                                    | -0.84 (-1.67, -0.01)                                    |
| <b>Number of siblings</b>                   | 0.45 (-0.01, 0.90)                               | 0.14 (-0.09, 0.38)                                     | 0.39 (-0.003, 0.79)                                     |
| <b>Race &amp; Ethnicity</b>                 |                                                  |                                                        |                                                         |
| Hispanic all races                          | 1.82 (0.52, 3.12)                                | 0.93 (0.28, 1.59)                                      | 1.01 (-0.11, 2.14)                                      |
| Non-Hispanic Black                          | 3.94 (1.95, 5.93)                                | 1.53 (0.53, 2.54)                                      | 2.85 (1.13, 4.57)                                       |
| Non-Hispanic Other                          | 2.16 (0.77, 3.54)                                | 1.57 (0.86, 2.29)                                      | 1.06 (-0.15, 2.26)                                      |
| Non-Hispanic White                          | REF                                              | REF                                                    | REF                                                     |
| <b>Maternal Education</b>                   |                                                  |                                                        |                                                         |
| Some college, no degree or lower            | REF                                              | REF                                                    | REF                                                     |
| Bachelor's degree                           | -0.43 (-1.62, 0.76)                              | -0.24 (-0.85, 0.37)                                    | -0.23 (-1.26, 0.81)                                     |
| Master's degree or higher                   | -0.74 (-2.00, 0.53)                              | -0.66 (-1.30, -0.02)                                   | -0.01 (-1.11, 1.08)                                     |

<sup>a</sup>Beta coefficients from linear mixed effects models that include cohort as a random intercept to adjust for the within cohort correlations. Each change in screentime outcome represents the difference in the weighted average of weekday and weekend parent-reported screentime between pandemic time period 1 and the pre-pandemic time period. The maximum Likelihood method was used to fit model. P-values were given from LMEM t-test. The analysis was conducted using the R package “lme4”.

<sup>b</sup>The pre-pandemic period is July 1, 2019- March 15, 2020. Pandemic data collection period 1 is December 1, 2020 – April 30, 2021.

**eTable 7. Estimated Change in Total Screen Time, Educational Screen Time, and Recreational Screen Time Between the Second Pandemic and the Prepandemic Time Period**

|                                                 | <b>Total screen time<sup>a</sup><br/>(hours/day)</b> | <b>Educational screen<br/>time<sup>a</sup> (hours/day)</b> | <b>Recreational screen<br/>time<sup>a</sup> (hours/day)</b> |
|-------------------------------------------------|------------------------------------------------------|------------------------------------------------------------|-------------------------------------------------------------|
| <b>N of Observations</b>                        | 179                                                  | 179                                                        | 179                                                         |
| <b>Pre-pandemic<br/>screen time<sup>b</sup></b> | -0.55 (-0.71, -0.38)                                 | -0.87 (-1.05, -0.69)                                       | -0.49 (-0.65, -0.32)                                        |
| <b>Baseline age</b>                             | 0.46 (0.24, 0.69)                                    | 0.07 (-0.02, 0.15)                                         | 0.47 (0.27, 0.67)                                           |
| <b>Male</b>                                     | 0.35 (-0.73, 1.42)                                   | 0.15 (-0.28, 0.58)                                         | 0.22 (-0.75, 1.19)                                          |
| <b>Number of siblings</b>                       | -0.05 (-0.57, 0.46)                                  | -0.02 (-0.22, 0.19)                                        | -0.04 (-0.51, 0.42)                                         |
| <b>Race &amp; Ethnicity</b>                     |                                                      |                                                            |                                                             |
| Hispanic all races                              | 1.65 (0.17, 3.14)                                    | 0.52 (-0.05, 1.10)                                         | 1.25 (-0.10, 2.59)                                          |
| Non-Hispanic Black                              | 0.57 (-2.22, 3.37)                                   | -0.55 (-1.58, 0.48)                                        | 0.82 (-1.72, 3.35)                                          |
| Non-Hispanic other                              | 1.32 (-0.25, 2.89)                                   | 0.93 (0.31, 1.55)                                          | 0.32 (-1.10, 1.74)                                          |
| Non-Hispanic White                              | REF                                                  | REF                                                        | REF                                                         |
| <b>Maternal Education</b>                       |                                                      |                                                            |                                                             |
| Some college, no<br>degree or lower             | REF                                                  | REF                                                        | REF                                                         |
| Bachelor's degree                               | -1.90 (-3.31, -0.48)                                 | -0.64 (-1.19, -0.08)                                       | -1.52 (-2.80, -0.23)                                        |
| Master's degree or<br>higher                    | -0.92 (-2.35, 0.51)                                  | -0.59 (-1.15, -0.04)                                       | -0.71 (-2.01, 0.59)                                         |

<sup>a</sup>Beta coefficients from linear mixed effects models that include cohort as a random intercept to adjust for the within cohort correlations. Each change in screentime outcome represents the difference in the weighted average of weekday and weekend parent-reported screentime between pandemic time period 2 and the pre-pandemic time period. The maximum Likelihood method was used to fit model. P-values were given from LMEM t-test. The analysis was conducted using the R package “lme4”.

<sup>b</sup>The pre-pandemic period is July 1, 2019- March 15, 2020. Pandemic data collection period 1 is December 1, 2020 – April 30, 2021, and pandemic period 2 is May 1, 2021 – August 31, 2021.
