# Supplementary material for: Trends in Screen Time Use Among Children During the COVID-19 Pandemic, July 2019 Through August 2021
Source: PubMed Central journal article supplement (PMC9932850; doi:10.1001/jamanetworkopen.2022.56157), 2023-02-15
Supplement: jamanetwopen-e2256157-s002.pdf [file jamanetwopen-e2256157-s002.pdf]

\*First name, last name, and suffix (if applicable) are required and will appear in PubMed.

| <b>*Group Name(s): Environmental Influences on Child Health Outcomes Program</b> |                   |                              |                  |                                               |                                          |                                                          |                                                                                            |
|----------------------------------------------------------------------------------|-------------------|------------------------------|------------------|-----------------------------------------------|------------------------------------------|----------------------------------------------------------|--------------------------------------------------------------------------------------------|
| <b>*First Name and Middle Initial(s)</b>                                         | <b>*Last Name</b> | <b>*Suffix (eg, Jr, III)</b> | Academic Degrees | Institution                                   | Location (city, state/province, country) | Role or Contribution, eg, chair, principal investigator  | Group (if more than 1 Group listed in the byline) and/or Subgroup (eg, Steering Committee) |
| Brian P                                                                          | Smith             |                              | MD               | Duke Clinical Research Institute              | Durham, North Carolina, USA              | ECHO Coordinating Center Principal Investigator          | ECHO Coordinating Center U2COD023375                                                       |
| Kristen L                                                                        | Newby             |                              | MD               | Duke Clinical Research Institute              | Durham, North Carolina, USA              | ECHO Coordinating Center Principal Investigator          | ECHO Coordinating Center U2COD023375                                                       |
| Lisa P                                                                           | Jacobson          |                              | PhD              | Johns Hopkins University                      | Baltimore, Maryland, USA                 | ECHO Data Analysis Center Principal Investigator         | ECHO Data Analysis Center U24D023382                                                       |
| Corette B                                                                        | Parker            |                              | PhD              | Research Triangle Park Institute              | Durham, North Carolina, USA              | ECHO Data Analysis Center Principal Investigator         | ECHO Data Analysis Center U24D023382                                                       |
| Richard C                                                                        | Gershon           |                              | PhD              | Northwestern University School of Medicine    | Evanston, Illinois, USA                  | ECHO Person Reported Outcome Core Principal Investigator | ECHO Person Reported Outcome Core U24OD023319                                              |
| David                                                                            | Cella             |                              | PhD              | Northwestern University School of Medicine    | Evanston, Illinois, USA                  | ECHO Person Reported Outcome Core Principal Investigator | ECHO Person Reported Outcome Core U24OD023319                                              |
| Akram N                                                                          | Alshawabkeh       |                              | PhD              | Northeastern University                       | Boston, Massachusetts, USA               | ECHO Cohort Principal Investigator                       | ECHO Cohort UH3OD023251                                                                    |
| Judy L                                                                           | Aschner           |                              | MD               | Albert Einstein College of Medicine           | Bronx, New York, USA                     | ECHO Cohort Principal Investigator                       | ECHO Cohort UH3OD023320                                                                    |
| Stephanie L                                                                      | Merhar            |                              | MD               | Cincinnati Children's Hospital Medical Center | Cincinnati, Ohio, USA                    | ECHO Cohort Principal Investigator                       | ECHO Cohort UH3OD023320                                                                    |
| Gloria S                                                                         | Pryhuber          |                              | MD               | University of Rochester Medical Center        | Rochester, NY, USA                       | ECHO Cohort Principal Investigator                       | ECHO Cohort UH3OD023320                                                                    |

## Supplemental Online Content: Nonauthor Collaborators

\*First name, last name, and suffix (if applicable) are required and will appear in PubMed.

| *First Name and Middle Initial(s) | *Last Name | *Suffix (eg, Jr, III) | Academic Degrees | Institution                                                                            | Location (city, state/province, country) | Role or Contribution, eg, chair, principal investigator | Group (if more than 1 Group listed in the byline) and/or Subgroup (eg, Steering Committee) |
|-----------------------------------|------------|-----------------------|------------------|----------------------------------------------------------------------------------------|------------------------------------------|---------------------------------------------------------|--------------------------------------------------------------------------------------------|
| Paul E                            | Moore      |                       | MD               | Vanderbilt Children's Hospital                                                         | Nashville, TN, USA                       | ECHO Cohort Principal Investigator                      | ECHO Cohort UH3OD023320                                                                    |
| Andrea L                          | Lampland   |                       | MD               | Children's Hospital and Clinic                                                         | Minneapolis, MN, USA                     | ECHO Cohort Principal Investigator                      | ECHO Cohort UH3OD023320                                                                    |
| Rajan                             | Wadhawan   |                       | MD               | Florida Hospital for Children                                                          | Orlando, FL, USA                         | ECHO Cohort Principal Investigator                      | ECHO Cohort UH3OD023320                                                                    |
| Carol L                           | Wagner     |                       | MD               | Medical University of South Carolina                                                   | Charleston, SC, USA                      | ECHO Cohort Principal Investigator                      | ECHO Cohort UH3OD023320                                                                    |
| Mark L                            | Hudak      |                       | MD               | University of Florida College of Medicine                                              | Jacksonville, FL, USA                    | ECHO Cohort Principal Investigator                      | ECHO Cohort UH3OD023320                                                                    |
| Dennis E                          | Mayock     |                       | MD               | University of Washington                                                               | Seattle, WA, USA                         | ECHO Cohort Principal Investigator                      | ECHO Cohort UH3OD023320                                                                    |
| Lisa K                            | Washburn   |                       | MD               | Wake Forest University School of Medicine                                              | Winston Salem, NC                        | ECHO Cohort Principal Investigator                      | ECHO Cohort UH3OD023320                                                                    |
| Lisa A                            | Croen      |                       | PhD              | Kaiser Permanente Northern California Division of Research                             | Oakland, CA, USA                         | ECHO Cohort Principal Investigator                      | ECHO Cohort UH3OD023289                                                                    |
| Caherine J                        | Karr       |                       | MD               | University of Washington, Department of Environmental and Occupational Health Sciences | Seattle, WA, USA                         | ECHO Cohort Principal Investigator                      | ECHO Cohort UH3OD023271                                                                    |
| Alex                              | Mason      |                       | PhD              | University of Tennessee Health Science Center                                          | Memphis, TN, USA                         | ECHO Cohort Principal Investigator                      | ECHO Cohort UH3OD023271                                                                    |
| Barry M                           | Lester     |                       | PhD              | Women & Infants Hospital of Rhode Island                                               | Providence RI, USA                       | ECHO Cohort Principal Investigator                      | ECHO Cohort UH3OD023347                                                                    |
| Brian S                           | Carter     |                       | MD               | Children's Mercy                                                                       | Kansas City, MO, USA                     | ECHO Cohort Principal Investigator                      | ECHO Cohort UH3OD023347                                                                    |
| Carmen J                          | Marsit     |                       | PhD              | Emory University                                                                       | Atlanta, GA, USA                         | ECHO Cohort Principal Investigator                      | ECHO Cohort UH3OD023347                                                                    |
| Steven L                          | Pastyrnak  |                       | PhD              | Helen DeVos Children's Hospital                                                        | Grand Rapids, MI, USA                    | ECHO Cohort Principal Investigator                      | ECHO Cohort UH3OD023347                                                                    |
| Charles                           | Neal       |                       | MD               | Kapiolani Medical Center for Women and Children                                        | Providence, RI, USA                      | ECHO Cohort Principal Investigator                      | ECHO Cohort UH3OD023347                                                                    |

## Supplemental Online Content: Nonauthor Collaborators

\*First name, last name, and suffix (if applicable) are required and will appear in PubMed.

| *First Name and Middle Initial(s) | *Last Name     | *Suffix (eg, Jr, III) | Academic Degrees | Institution                                                              | Location (city, state/province, country) | Role or Contribution, eg, chair, principal investigator | Group (if more than 1 Group listed in the byline) and/or Subgroup (eg, Steering Committee) |
|-----------------------------------|----------------|-----------------------|------------------|--------------------------------------------------------------------------|------------------------------------------|---------------------------------------------------------|--------------------------------------------------------------------------------------------|
| Lynne M                           | Smith          |                       | MD               | Los Angeles Biomedical Research Institute at Harbour-UCLA Medical Center | Los Angeles CA, USA                      | ECHO Cohort Principal Investigator                      | ECHO Cohort UH3OD023347                                                                    |
| Jennifer B                        | Helderman      |                       | MD               | Wake Forest University School of Medicine                                | Winston Salem, NC                        | ECHO Cohort Principal Investigator                      | ECHO Cohort UH3OD023347                                                                    |
| Cindy                             | McEvoy         |                       | MD               | Oregon Health and Science University                                     | Portland, OR, USA                        | ECHO Cohort Principal Investigator                      | ECHO Cohort UH3OD023288                                                                    |
| Robert S                          | Tepper         |                       | MD               | Indiana University, Riley Hospital for Children                          | Indianapolis, IN, USA                    | ECHO Cohort Principal Investigator                      | ECHO Cohort UH3OD023288                                                                    |
| Jean                              | Kerver         |                       | PhD              | Michigan State University                                                | East Lansing, MI, USA                    | ECHO Cohort Principal Investigator                      | ECHO Cohort UH3OD023285                                                                    |
| Charles                           | Barone         |                       | MD               | Henry Ford Health System                                                 | Detroit, MI, USA                         | ECHO Cohort Principal Investigator                      | ECHO Cohort UH3OD023285                                                                    |
| Patricia                          | McKane         |                       | DVM              | Michigan Department of Health and Human Services                         | Lansing, MI, USA                         | ECHO Cohort Principal Investigator                      | ECHO Cohort UH3OD023285                                                                    |
| Nigel                             | Paneth         |                       | MD               | Michigan State University                                                | East Lansing, MI, USA                    | ECHO Cohort Principal Investigator                      | ECHO Cohort UH3OD023285                                                                    |
| Michael R                         | Elliott        |                       | PhD              | University of Michigan                                                   | Ann Arbor, MI, USA                       | ECHO Cohort Principal Investigator                      | ECHO Cohort UH3OD023285                                                                    |
| Leonardo                          | Trasande       |                       | MD               | New York School of Medicine                                              | New York, NY, USA                        | ECHO Cohort Principal Investigator                      | ECHO Cohort UH3OD023305                                                                    |
| Sheela                            | Sathyanarayana |                       | MD               | Seattle Children's Research Institute                                    | Seattle, WA                              | ECHO Cohort Principal Investigator                      | ECHO Cohort UH3OD023271                                                                    |
| Nicole                            | Bush           |                       | PhD              | University of California, San Francisco                                  | San Francisco CA, USA                    | ECHO Cohort Principal Investigator                      | ECHO Cohort UH3OD023271 and UH3OD023282                                                    |
| Ruby HN                           | Nguyen         |                       | PhD              | University of Minnesota                                                  | Minneapolis, MN, USA                     | ECHO Cohort Principal Investigator                      | ECHO Cohort UH3OD023271 and UH3OD023282                                                    |

Supplemental Online Content: Nonauthor Collaborators

\*First name, last name, and suffix (if applicable) are required and will appear in PubMed.

| <b>*First Name and Middle Initial(s)</b> | <b>*Last Name</b> | <b>*Suffix (eg, Jr, III)</b> | Academic Degrees | Institution                            | Location (city, state/province, country) | Role or Contribution, eg, chair, principal investigator | Group (if more than 1 Group listed in the byline) and/or Subgroup (eg, Steering Committee) |
|------------------------------------------|-------------------|------------------------------|------------------|----------------------------------------|------------------------------------------|---------------------------------------------------------|--------------------------------------------------------------------------------------------|
| Emily S                                  | Barrett           |                              | PhD              | University of Rochester Medical Center | Rochester, NY, USA                       | ECHO Cohort Principal Investigator                      | ECHO Cohort UH3OD023271 and UH3OD023282                                                    |
