# Supplementary material for: Trends in Screen Time Use Among Children During the COVID-19 Pandemic, July 2019 Through August 2021
Source: PubMed Central journal article supplement (PMC9932850; doi:10.1001/jamanetworkopen.2022.56157), 2023-02-15
Supplement: jamanetwopen-e2256157-s003.pdf [file jamanetwopen-e2256157-s003.pdf]

## Data Sharing Statement

Hedderson. Trends in Screen Time Use Among Children During the COVID-19 Pandemic, July 2019 Through August 2021. *JAMA Netw Open*. Published February 15, 2023.  
doi:10.1001/jamanetworkopen.2022.56157

### Data

**Data available:** No

### Additional Information

**Explanation for why data not available:** Data sharing is not permitted by our IRB.
